# Supplementary material
Source: HighWire-hosted journal article supplement (https://bmjopen.bmj.com/content/7/11/e018646)
Supplement: inline-supplementary-material-1 [file inline-supplementary-material-1.pdf]

## **Search strategies**

### **i. MedLine(OViD) and Embase**

- 1 exp cornea/
- 2 cornea\*.tw.
- 3 1 or 2
- 4 exp ophthalmic nerve/
- 5 nerve\*.tw.
- 6 subbasal.tw.
- 7 sub-basal.tw.
- 8 mm?mm.tw.
- 9 neuropath\*.tw.
- 10 plex\*.tw.
- 11 4 or 5 or 6 or 7 or 8 or 9 or 10
- 12 confocal.tw.
- 13 microscop\*.tw.
- 14 "in?vivo".tw.
- 15 12 or 13 or 14
- 16 3 and 11 and 15

### **ii. The Cochrane library**

- 1 cornea
- 2 nerve\*
- 3 innervat\*
- 4 subbasal
- 5 sub-basal
- 6 mm?mm
- 7 neuropath\*
- 8 plex\*
- 9 confocal
- 10 microscop\*
- 11 "in?vivo"
- 12 2 or 3 or 4 or 5 or 6 or 7 or 8
- 13 9 or 10 or 11
- 14 1 and 12 and 13
